# Supplementary material for: A fast-responsive fluorescent probe based on a styrylcoumarin dye for visualizing hydrogen sulfide in living MCF-7 cells and zebrafish
Source: Royal Society of Chemistry journal article supplement (doi:10.1039/d2ra00997h), 2022-01-01
Supplement: d2ra00997h1.pdf [file d2ra00997h1.pdf]

*Supporting information for*

**Fast-responsive fluorescent probe based on the styrylcoumarin dye for visualizing hydrogen sulfide in living MCF-7 cells and zebrafish**

Xu Tong<sup>a</sup>, Ligu Hao<sup>b</sup>, Xue Song<sup>a</sup>, Shuang Wu<sup>a</sup>, Na Zhang<sup>a</sup>, Zhongtao Li<sup>b</sup>, Song Chen<sup>c</sup> and Peng Hou<sup>c,\*</sup>

<sup>a</sup>The Third Affiliated Hospital, Qiqihar Medical University, Qiqihar, 161006, P. R.

China

<sup>b</sup>College of Medical Technology, Qiqihar Medical University, Qiqihar, 161006, P. R.

China

<sup>c</sup>College of Pharmacy, Qiqihar Medical University, Qiqihar, 161006, P. R. China

\*Corresponding author,

E-mail address:houpeng1982@163.com

## Table of contents

### Page

|                          |           |
|--------------------------|-----------|
| <b>Table S1.....</b>     | <b>S1</b> |
| <b>Figures S1-2.....</b> | <b>S5</b> |
| <b>Figures S3-4.....</b> | <b>S6</b> |
| <b>Figures S5-6.....</b> | <b>S7</b> |
| <b>Figures S7-8.....</b> | <b>S8</b> |
| <b>Table S2.....</b>     | <b>S9</b> |

**Table S1.** The reported fluorescent probes for H<sub>2</sub>S.

| Probe                                                                               | Stokes shift | Test system                | Detection limit | Response time | Application                                             | Literature                                   |
|-------------------------------------------------------------------------------------|--------------|----------------------------|-----------------|---------------|---------------------------------------------------------|----------------------------------------------|
| 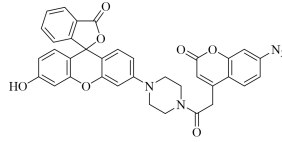   | 68 nm        | MeCN:PBS = 9:1, v/v        | 0.031 μM        | 8 s           | HepG2 cells<br>Nude mice                                | J Mater Chem B, 2018, 6, 4903-4908           |
|    | 100 nm       | PBS buffer with 30% DMSO   | 1.65 μM         | 5-6 min       | HeLa cells<br>Fresh rat liver slices                    | Sensors and Actuators B, 2017, 248, 50-56    |
|   | 105 nm       | PBS buffer with 5% DMSO    | 7.77 μM         | 30 min        | HeLa cells<br>The liver tissue slices<br>Zebrafish      | Scientific Reports, 2017, 7, 1-9             |
|  | 70 nm        | PBS buffer with 0.2% DMSO  | 24.3 nM         | 20 min        | HeLa cells<br>MDA-MB-231<br>DU145 cells<br>3T3-L1 cells | Chemistry, an Asian Journal, 2016, 11, 68-71 |
|  | 61 nm        | PBS:DMF = 1:1, v/v         | 96 nM           | 4 min         | HepG2 cells<br>Nude mice                                | Dyes and Pigments, 2021, 185, 108901         |
|  | 106 nm       | DMSO:PBS = 2:1, v/v        | 0.1 μM          | 0.5 min       | SHSY5Y cells<br>The mouse                               | Dyes and Pigments, 2021, 189, 109231         |
|  | 116 nm       | HEPES buffer with 20% THF. | 7.63 μM         | 20 min        | MCF-7 cells                                             | New J.Chem., 2021, 45, 13399-13405           |
|  | 103 nm       | PBS buffer with 1% DMF     | 47 nM           | -----         | HepG2 cells                                             | Analytical Methods, 2017, 9, 2859-2864       |

|                                                                                     |        |                                    |          |         |                                                                       |                                                                 |
|-------------------------------------------------------------------------------------|--------|------------------------------------|----------|---------|-----------------------------------------------------------------------|-----------------------------------------------------------------|
| 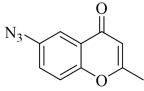   | 140 nm | PBS:DMSO<br>= 5:5, v/v             | 18 nM    | 30 min  | HeLa cells                                                            | Talanta,<br>2019, 195,<br>850-856                               |
|    | 140 nm | PBS buffer<br>with 10%<br>DMSO     | 214.5 nM | -----   | A549 cells<br>HepG2 cells<br>Rat renal<br>tubular<br>epithelial cells | Organic &<br>Biomolec-ular<br>Chemistry,<br>2018,16,<br>712-716 |
|    | 44 nm  | CH <sub>3</sub> CN                 | 5.2 nM   | -----   | HeLa cells                                                            | New<br>J.Chem.,<br>2017, 41,<br>3367-3373                       |
|    | 85 nm  | PBS buffer<br>with<br>1 mM<br>CTAB | 0.2 μM   | 50 min  | A549 cells<br>Zebrafish                                               | Tetrahedro<br>n, 2021,<br>89, 132174                            |
|   | 69 nm  | PBS buffer<br>with<br>20% ethanol  | 0.51 μM  | <30 min | HL-7702 cells<br>NAFLD cells<br>The mouse                             | Anal.<br>Chem.,<br>2021, 93,<br>16673-166<br>82                 |
|  | 83 nm  | DMSO:PBS<br>= 2:1, v/v             | 10 nM    | 0.5 min | SHSY5Y cells<br>The mouse                                             | Dyes and<br>Pigments,<br>2021, 189,<br>109231                   |
|  | 93 nm  | PBS buffer<br>with<br>50% EtOH     | 8.87 nM  | -----   | HeLa cells                                                            | New<br>J.Chem.,<br>2017, 41,<br>1119-1123                       |
|  | 85 nm  | PBS buffer                         | 1.7 μM   | 2 min   | HeLa cells                                                            | Chemical<br>Communi-<br>cations,<br>2016, 52,<br>6415-6418      |

|                                                                                     |        |                                             |         |        |                             |                                                         |
|-------------------------------------------------------------------------------------|--------|---------------------------------------------|---------|--------|-----------------------------|---------------------------------------------------------|
| 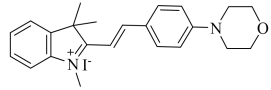   | 76 nm  | DMSO:PBS<br>= 1:1, v/v                      | 15 nM   | 2 min  | HeLa cells                  | Analytical<br>Methods,<br>2017, 9,<br>3290-3295         |
|    | 54 nm  | PBS buffer<br>with<br>50% DMSO              | 90 nM   | 3 h    | HeLa cells                  | Sensor<br>Actuat.<br>B-Chem,<br>2016, 232,<br>705-711   |
|    | 53 nm  | PBS buffer<br>with<br>5% CH <sub>3</sub> CN | 38 nM   | -----  | MCF-7 cells<br>Living mice  | Scientific<br>Reports,<br>2016, 6,<br>18868             |
|   | 137 nm | DMSO:PBS<br>= 1:1, v/v                      | 83 nM   | 8 min  | HeLa cells                  | Sensor<br>Actuat.<br>B-Chem,<br>2018, 255,<br>2347-2355 |
|  | 73 nm  | PBS buffer<br>with<br>1% DMSO               | 4.05 μM | 25 min | HeLa cells                  | New<br>J.Chem.,<br>2018, 42,<br>19478-<br>19484         |
|  | 185 nm | PBS buffer                                  | 9.95 nM | 10 s   | Paper<br>Yellow<br>croakers | Chem.<br>Commun.,<br>2021, 57,<br>5012-5015             |
|  | 85 nm  | PBS buffer<br>with<br>5% DMSO               | 2.5 μM  | 25 min | HeLa cells<br>Zebrafish     | Anal.<br>Bioanal.<br>Chem.,<br>2019, 411,<br>7127-7136  |

|                                                                                                   |        |                                      |          |        |                          |                                                       |
|---------------------------------------------------------------------------------------------------|--------|--------------------------------------|----------|--------|--------------------------|-------------------------------------------------------|
| 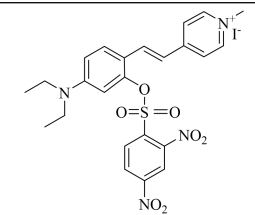                 | 111 nm | PBS:DMF=<br>1:1, v/v                 | 356 nM   | 4 s    | MCF-7 cells              | J. Agric.<br>Food<br>Chem.,<br>2021, 69,<br>4628-4634 |
|                  | 150 nm | PBS:DMSO<br>= 9:1, v/v               | 39.1 nM  | 12 min | HeLa cells<br>Zebrafish  | Anal.<br>Chem.,<br>2020, 92,<br>9982-9988             |
|  <p>COZ-DNBS</p> | 173 nm | PBS:CH <sub>3</sub> C<br>N= 8:2, v/v | 38.6. nM | < 1min | MCF-7 cells<br>Zebrafish | This work                                             |

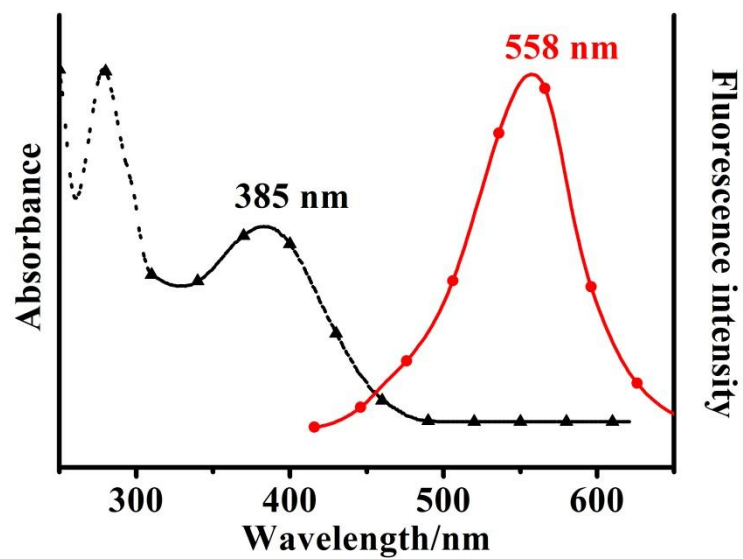

**Fig.S1** Absorption (black line) and fluorescence spectra (red line) of COZ-OH in PBS buffer.

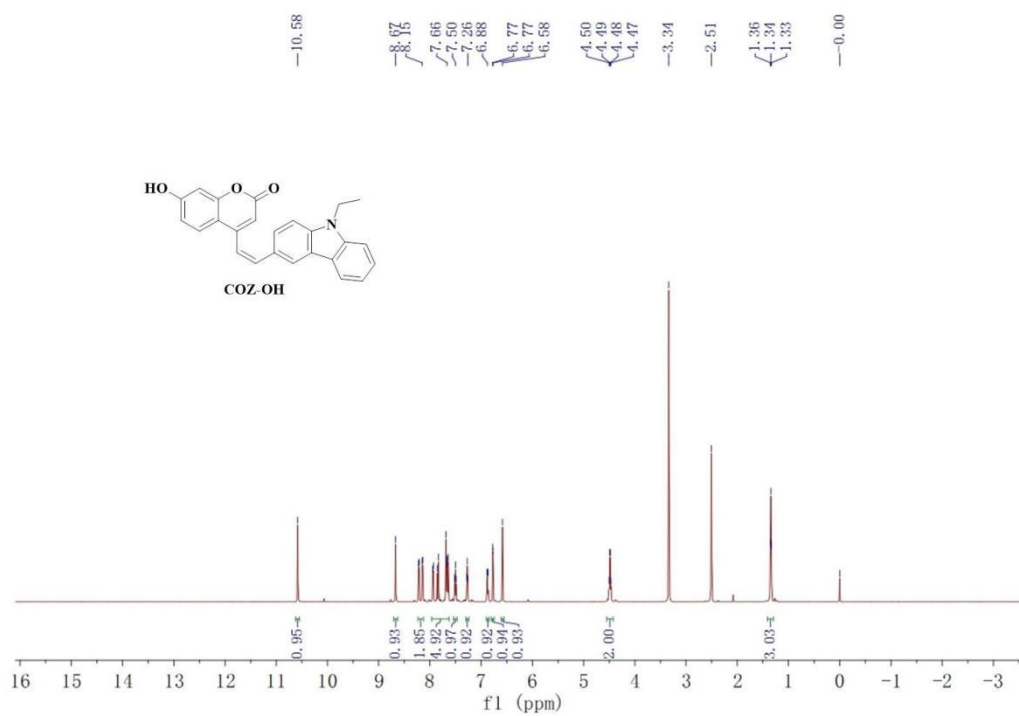

**Fig.S2** <sup>1</sup>H NMR spectrum of COZ-OH in DMSO-d<sub>6</sub>.

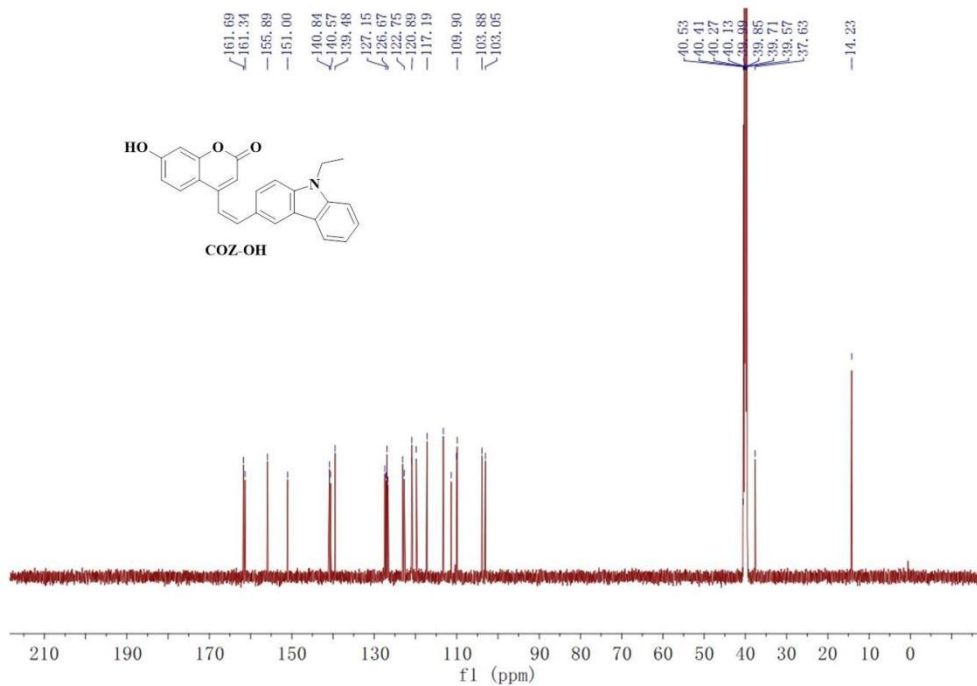

Fig.S3  $^{13}\text{C}$  NMR spectrum of COZ-OH in  $\text{DMSO-}d_6$ .

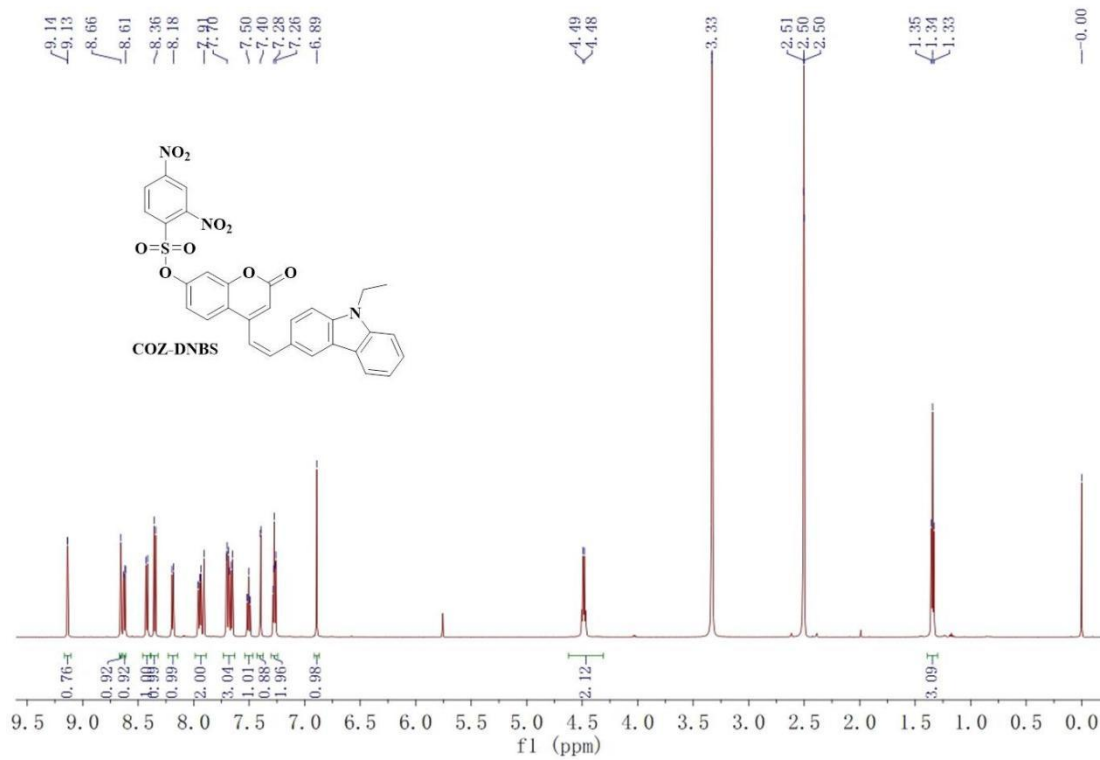

Fig.S4  $^1\text{H}$  NMR spectrum of COZ-DNBS in  $\text{DMSO-}d_6$ .



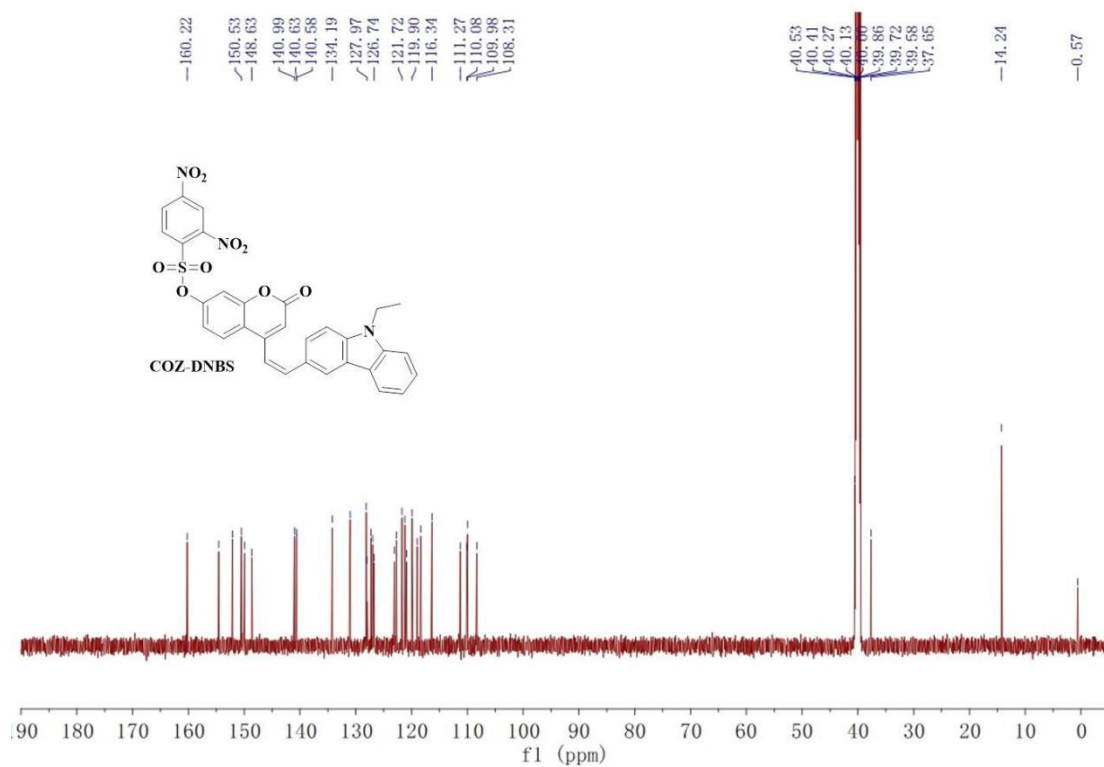

**Fig.S5** <sup>13</sup>C NMR spectrum of COZ-DNBS in DMSO-*d*<sub>6</sub>.

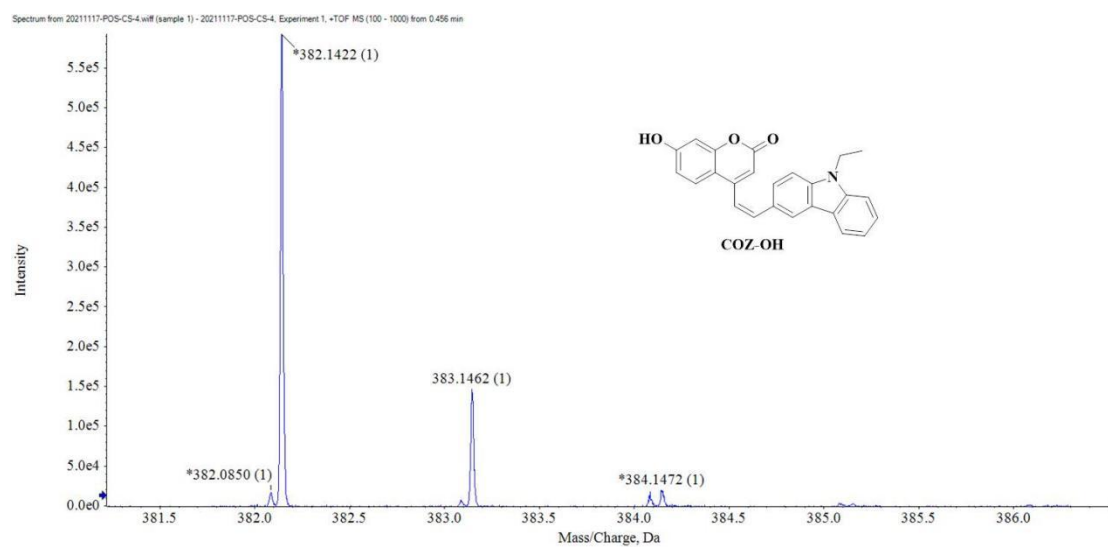

**Fig.S6** HRMS spectrum of COZ-OH.

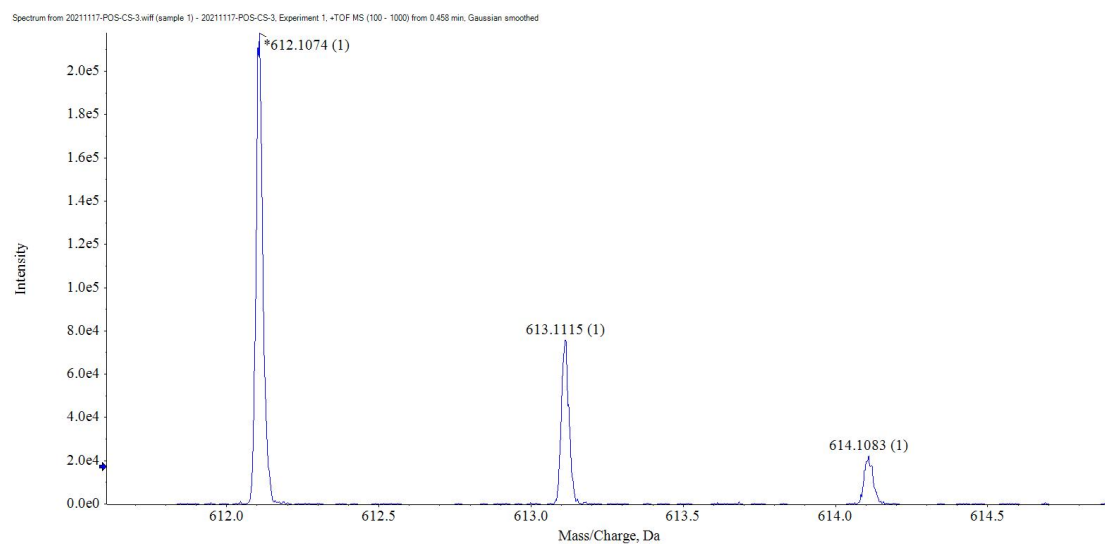

**Fig.S7** HRMS spectrum of **COZ-DNBS**.

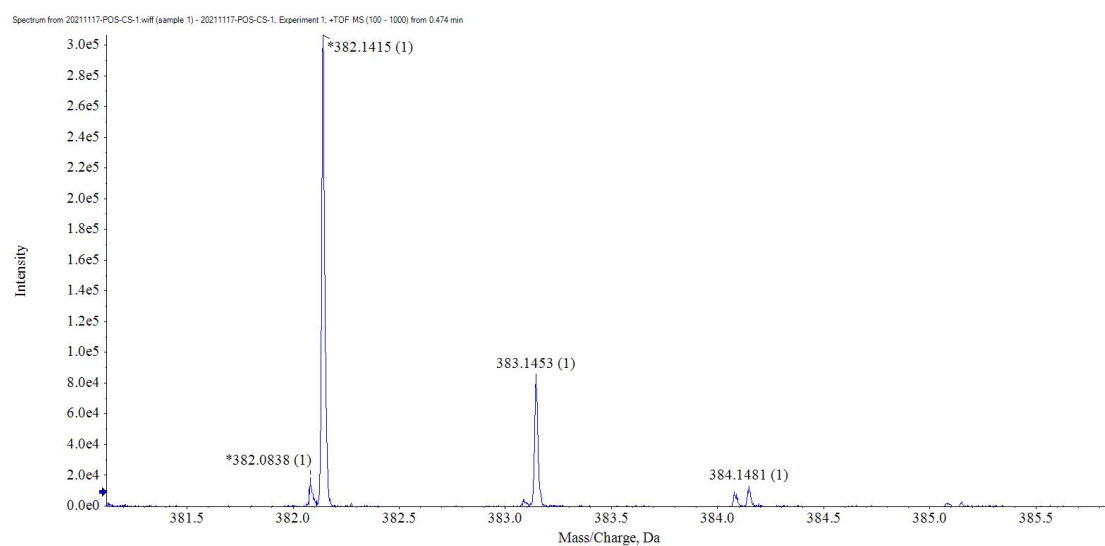

**Fig.S8** HRMS spectrum of **COZ-DNBS + H<sub>2</sub>S**.

Table S2 The recovery test of H<sub>2</sub>S with probe **COZ-DNBS** in spiked samples.

| Water Sample | Spiked (μM) | Found (μM) | Recovery(%) | RSD (%) |
|--------------|-------------|------------|-------------|---------|
| Tap          | 5.00        | 4.92       | 98.4        | 0.73    |
|              | 10.00       | 9.61       | 96.1        | 1.65    |
|              | 20.00       | 20.68      | 103.4       | 2.19    |
| Lake         | 5.00        | 5.01       | 100.2       | 1.17    |
|              | 10.00       | 9.56       | 95.6        | 0.94    |
|              | 20.00       | 19.68      | 98.4        | 1.58    |
| River        | 5.00        | 4.89       | 97.8        | 0.41    |
|              | 10.00       | 10.17      | 101.7       | 1.62    |
|              | 20.00       | 20.64      | 103.2       | 1.03    |
